# Supplementary material for: Species diversity of fishes in the Dingqu River Basin, tributary of the upper Yangtze River, China
Source: Biodivers Data J. 2021 Nov 22;9:e76669. doi: 10.3897/BDJ.9.e76669 (PMC8629911; doi:10.3897/BDJ.9.e76669)
Supplement: Supplementary material 1 — Collected fish taxon-occurrences of Dingqu River [file bdj-09-e76669-s001.tsv]

occurrenceID	catalogNumber	basisOfRecord	eventDate	scientificName	kingdom	phylum	class	order	family	subfamily	genus	taxonRank	ownerInstitutionCode	individualCount	recordedBy	identifiedBy	decimalLatitude	decimalLongitude	maximumElevationInMeters	geodeticDatum	coordinateUncertaintyInMeters	locality	country	stateProvince	municipality	waterBody	habitat	dynamicProperties
catalog:DQ:Fish:001	JXJ2012001	PreservedSpecimen	2012-05-04	Schizopygopsis malacanthus malacanthus Herzenstein, 1891	Animalia	Chordata	Actinopterygii	Cypriniformes	Cyprinidae	Schizothoracinae	Schizopygopsis	subspecies	ASIZB	5	Chunguang Zahng | Yahui Zhao	Chunguang Zahng | Yahui Zhao	29.0825	99.3797	3297	WGS84	±10m	Derong	China	Sichuan	Ganzi Tibetan Autonomous Prefecture	Dingqu River	run water | pool	{"endemicToJinshajiangR":"yes", "endemicToYangtzeR":"yes", "degreeThreat":"VU"}
catalog:DQ:Fish:002	JXJ2012002	PreservedSpecimen	2012-09-12	Ptychobarbus kaznakovi Nikolsky, 1903	Animalia	Chordata	Actinopterygii	Cypriniformes	Cyprinidae	Schizothoracinae	Ptychobarbus	species	ASIZB	1	Chunguang Zahng | Yahui Zhao	Chunguang Zahng | Yahui Zhao	29.0600	99.6900	3373	WGS84	±10m	Xiangcheng	China	Sichuan	Ganzi Tibetan Autonomous Prefecture	Mayihe River	run water | pool	{"endemicToJinshajiangR":"no", "endemicToYangtzeR":"no", "degreeThreat":"VU"}
catalog:DQ:Fish:003	JXJ2012003	PreservedSpecimen	2012-09-13	Ptychobarbus kaznakovi Nikolsky, 1903	Animalia	Chordata	Actinopterygii	Cypriniformes	Cyprinidae	Schizothoracinae	Ptychobarbus	species	ASIZB	7	Chunguang Zahng | Yahui Zhao	Chunguang Zahng | Yahui Zhao	29.1800	99.9100	3034	WGS84	±10m	Xiangcheng	China	Sichuan	Ganzi Tibetan Autonomous Prefecture	Shuoqu River	run water | pool	{"endemicToJinshajiangR":"no", "endemicToYangtzeR":"no", "degreeThreat":"VU"}
catalog:DQ:Fish:004	JXJ2012004	PreservedSpecimen	2012-09-13	Schizopygopsis malacanthus malacanthus Herzenstein, 1891	Animalia	Chordata	Actinopterygii	Cypriniformes	Cyprinidae	Schizothoracinae	Schizopygopsis	subspecies	ASIZB	19	Chunguang Zahng | Yahui Zhao	Chunguang Zahng | Yahui Zhao	29.1500	99.5400	2896	WGS84	±10m	Xiangcheng	China	Sichuan	Ganzi Tibetan Autonomous Prefecture	Dingqu River	run water | pool	{"endemicToJinshajiangR":"yes", "endemicToYangtzeR":"yes", "degreeThreat":"VU"}
catalog:DQ:Fish:005	JXJ2012005	PreservedSpecimen	2012-09-13	Triplophysa leptosoma (Herzenstein, 1888)	Animalia	Chordata	Actinopterygii	Cypriniformes	Nemacheilidae	Nemacheilinae	Triplophysa	species	ASIZB	5	Chunguang Zahng | Yahui Zhao	Chunguang Zahng | Yahui Zhao	29.1800	99.9100	3034	WGS84	±10m	Xiangcheng	China	Sichuan	Ganzi Tibetan Autonomous Prefecture	Shuoqu River	rapid water	{"endemicToJinshajiangR":"yes", "endemicToYangtzeR":"yes", "degreeThreat":"LC"}
catalog:DQ:Fish:006	JXJ2012006	PreservedSpecimen	2012-09-15	Gymnocypris potanini firmispinatus Wu & Wu, 1988	Animalia	Chordata	Actinopterygii	Cypriniformes	Cyprinidae	Schizothoracinae	Gymnocypris	subspecies	ASIZB	17	Chunguang Zahng | Yahui Zhao	Chunguang Zahng | Yahui Zhao	28.6555	99.2753	2329	WGS84	±10m	Derong	China	Sichuan	Ganzi Tibetan Autonomous Prefecture	Dingqu River	run water | pool	{"endemicToJinshajiangR":"yes", "endemicToYangtzeR":"yes", "degreeThreat":"NE"}
catalog:DQ:Fish:007	JXJ2012007	PreservedSpecimen	2012-09-15	Schizothorax grahami (Regan, 1904)	Animalia	Chordata	Actinopterygii	Cypriniformes	Cyprinidae	Schizothoracinae	Schizothorax	species	ASIZB	4	Chunguang Zahng | Yahui Zhao	Chunguang Zahng | Yahui Zhao	28.6555	99.2753	2329	WGS84	±10m	Derong	China	Sichuan	Ganzi Tibetan Autonomous Prefecture	Dingqu River	run water	{"endemicToJinshajiangR":"no", "endemicToYangtzeR":"yes", "degreeThreat":"EN"}
catalog:DQ:Fish:008	JXJ2019001	PreservedSpecimen	2019-09-04	Gymnocypris potanini firmispinatus Wu & Wu, 1988	Animalia	Chordata	Actinopterygii	Cypriniformes	Cyprinidae	Schizothoracinae	Gymnocypris	subspecies	ASIZB	19	Yang Zhao | Chenyi Niu	Zhixian Sun | Jie Bai	29.7039	99.7940	3522	WGS84	±10m	Litang	China	Sichuan	Ganzi Tibetan Autonomous Prefecture	Shuoqu River	run water | pool	{"endemicToJinshajiangR":"yes", "endemicToYangtzeR":"yes", "degreeThreat":"NE"}
catalog:DQ:Fish:009	JXJ2019002	PreservedSpecimen	2019-09-04	Schizopygopsis malacanthus malacanthus Herzenstein, 1891	Animalia	Chordata	Actinopterygii	Cypriniformes	Cyprinidae	Schizothoracinae	Schizopygopsis	subspecies	ASIZB	11	Yang Zhao | Chenyi Niu	Zhixian Sun | Jie Bai	29.7906	99.8113	3617	WGS84	±10m	Litang	China	Sichuan	Ganzi Tibetan Autonomous Prefecture	Shuoqu River	run water | pool	{"endemicToJinshajiangR":"yes", "endemicToYangtzeR":"yes", "degreeThreat":"VU"}
catalog:DQ:Fish:010	JXJ2019003	PreservedSpecimen	2019-09-04	Schizopygopsis malacanthus malacanthus Herzenstein, 1891	Animalia	Chordata	Actinopterygii	Cypriniformes	Cyprinidae	Schizothoracinae	Schizopygopsis	subspecies	ASIZB	17	Yang Zhao | Chenyi Niu	Zhixian Sun | Jie Bai	29.7815	99.8057	3616	WGS84	±10m	Litang	China	Sichuan	Ganzi Tibetan Autonomous Prefecture	Shuoqu River	run water | pool	{"endemicToJinshajiangR":"yes", "endemicToYangtzeR":"yes", "degreeThreat":"VU"}
catalog:DQ:Fish:011	JXJ2019004	PreservedSpecimen	2019-09-04	Schizothorax wangchiachii (Fang, 1936)	Animalia	Chordata	Actinopterygii	Cypriniformes	Cyprinidae	Schizothoracinae	Schizothorax	species	ASIZB	5	Yang Zhao | Chenyi Niu	Zhixian Sun | Jie Bai	29.7039	99.7940	3522	WGS84	±10m	Litang	China	Sichuan	Ganzi Tibetan Autonomous Prefecture	Shuoqu River	run water	{"endemicToJinshajiangR":"no", "endemicToYangtzeR":"yes", "degreeThreat":"LC"}
catalog:DQ:Fish:012	JXJ2019005	PreservedSpecimen	2019-09-04	Triplophysa leptosoma (Herzenstein, 1888)	Animalia	Chordata	Actinopterygii	Cypriniformes	Nemacheilidae	Nemacheilinae	Triplophysa	species	ASIZB	1	Yang Zhao | Chenyi Niu	Zhixian Sun | Jie Bai	29.7039	99.7940	3522	WGS84	±10m	Litang	China	Sichuan	Ganzi Tibetan Autonomous Prefecture	Shuoqu River	rapid water	{"endemicToJinshajiangR":"yes", "endemicToYangtzeR":"yes", "degreeThreat":"LC"}
catalog:DQ:Fish:013	JXJ2019006	PreservedSpecimen	2019-09-08	Gymnocypris potanini firmispinatus Wu & Wu, 1988	Animalia	Chordata	Actinopterygii	Cypriniformes	Cyprinidae	Schizothoracinae	Gymnocypris	subspecies	ASIZB	2	Yang Zhao | Chenyi Niu	Zhixian Sun | Jie Bai	28.8895	99.8261	2682	WGS84	±10m	Xiangcheng	China	Sichuan	Ganzi Tibetan Autonomous Prefecture	Shuoqu River	run water | pool	{"endemicToJinshajiangR":"yes", "endemicToYangtzeR":"yes", "degreeThreat":"NE"}
catalog:DQ:Fish:014	JXJ2019007	PreservedSpecimen	2019-09-08	Schizopygopsis malacanthus malacanthus Herzenstein, 1891	Animalia	Chordata	Actinopterygii	Cypriniformes	Cyprinidae	Schizothoracinae	Schizopygopsis	subspecies	ASIZB	5	Yang Zhao | Chenyi Niu	Zhixian Sun | Jie Bai	28.9703	99.8407	2795	WGS84	±10m	Xiangcheng	China	Sichuan	Ganzi Tibetan Autonomous Prefecture	Shuoqu River	run water | pool	{"endemicToJinshajiangR":"yes", "endemicToYangtzeR":"yes", "degreeThreat":"VU"}
catalog:DQ:Fish:015	JXJ2019008	PreservedSpecimen	2019-09-08	Schizothorax wangchiachii (Fang, 1936)	Animalia	Chordata	Actinopterygii	Cypriniformes	Cyprinidae	Schizothoracinae	Schizothorax	species	ASIZB	2	Yang Zhao | Chenyi Niu	Zhixian Sun | Jie Bai	28.8895	99.8261	2682	WGS84	±10m	Xiangcheng	China	Sichuan	Ganzi Tibetan Autonomous Prefecture	Shuoqu River	run water	{"endemicToJinshajiangR":"no", "endemicToYangtzeR":"yes", "degreeThreat":"LC"}
catalog:DQ:Fish:016	JXJ2019009	PreservedSpecimen	2019-09-08	Triplophysa pseudostenura He, Zhang & Song, 2013	Animalia	Chordata	Actinopterygii	Cypriniformes	Nemacheilidae	Nemacheilinae	Triplophysa	species	ASIZB	2	Yang Zhao | Chenyi Niu	Zhixian Sun | Jie Bai	28.9703	99.8407	2795	WGS84	±10m	Xiangcheng	China	Sichuan	Ganzi Tibetan Autonomous Prefecture	Shuoqu River	rapid water	{"endemicToJinshajiangR":"no", "endemicToYangtzeR":"yes", "degreeThreat":"DD"}
catalog:DQ:Fish:017	JXJ2019010	PreservedSpecimen	2019-09-09	Gymnocypris potanini firmispinatus Wu & Wu, 1988	Animalia	Chordata	Actinopterygii	Cypriniformes	Cyprinidae	Schizothoracinae	Gymnocypris	subspecies	ASIZB	11	Yang Zhao | Chenyi Niu	Zhixian Sun | Jie Bai	29.0730	99.8939	2905	WGS84	±10m	Xiangcheng	China	Sichuan	Ganzi Tibetan Autonomous Prefecture	Shuoqu River	run water | pool	{"endemicToJinshajiangR":"yes", "endemicToYangtzeR":"yes", "degreeThreat":"NE"}
catalog:DQ:Fish:018	JXJ2019011	PreservedSpecimen	2019-09-09	Schizothorax wangchiachii (Fang, 1936)	Animalia	Chordata	Actinopterygii	Cypriniformes	Cyprinidae	Schizothoracinae	Schizothorax	species	ASIZB	6	Yang Zhao | Chenyi Niu	Zhixian Sun | Jie Bai	29.0271	99.8779	2847	WGS84	±10m	Xiangcheng	China	Sichuan	Ganzi Tibetan Autonomous Prefecture	Shuoqu River	run water	{"endemicToJinshajiangR":"no", "endemicToYangtzeR":"yes", "degreeThreat":"LC"}
catalog:DQ:Fish:019	JXJ2019012	PreservedSpecimen	2019-09-09	Schizothorax wangchiachii (Fang, 1936)	Animalia	Chordata	Actinopterygii	Cypriniformes	Cyprinidae	Schizothoracinae	Schizothorax	species	ASIZB	1	Yang Zhao | Chenyi Niu	Zhixian Sun | Jie Bai	29.0730	99.8939	2905	WGS84	±10m	Xiangcheng	China	Sichuan	Ganzi Tibetan Autonomous Prefecture	Shuoqu River	run water	{"endemicToJinshajiangR":"no", "endemicToYangtzeR":"yes", "degreeThreat":"LC"}
catalog:DQ:Fish:020	JXJ2019013	PreservedSpecimen	2019-09-09	Triplophysa bleekeri (Sauvage & Dabry de Thiersant, 1874)	Animalia	Chordata	Actinopterygii	Cypriniformes	Nemacheilidae	Nemacheilinae	Triplophysa	species	ASIZB	3	Yang Zhao | Chenyi Niu	Zhixian Sun | Jie Bai	29.0730	99.8939	2905	WGS84	±10m	Xiangcheng	China	Sichuan	Ganzi Tibetan Autonomous Prefecture	Shuoqu River	rapid water	{"endemicToJinshajiangR":"no", "endemicToYangtzeR":"yes", "degreeThreat":"LC"}
catalog:DQ:Fish:021	JXJ2019014	PreservedSpecimen	2019-09-09	Triplophysa pseudostenura He, Zhang & Song, 2013	Animalia	Chordata	Actinopterygii	Cypriniformes	Nemacheilidae	Nemacheilinae	Triplophysa	species	ASIZB	3	Yang Zhao | Chenyi Niu	Zhixian Sun | Jie Bai	29.0730	99.8939	2905	WGS84	±10m	Xiangcheng	China	Sichuan	Ganzi Tibetan Autonomous Prefecture	Shuoqu River	rapid water	{"endemicToJinshajiangR":"no", "endemicToYangtzeR":"yes", "degreeThreat":"DD"}
catalog:DQ:Fish:022	JXJ2019015	PreservedSpecimen	2019-09-10	Gymnocypris potanini firmispinatus Wu & Wu, 1988	Animalia	Chordata	Actinopterygii	Cypriniformes	Cyprinidae	Schizothoracinae	Gymnocypris	subspecies	ASIZB	1	Yang Zhao | Chenyi Niu	Zhixian Sun | Jie Bai	28.5607	99.2864	2170	WGS84	±10m	Derong	China	Sichuan	Ganzi Tibetan Autonomous Prefecture	Dingqu River	run water | pool	{"endemicToJinshajiangR":"yes", "endemicToYangtzeR":"yes", "degreeThreat":"NE"}
catalog:DQ:Fish:023	JXJ2019016	PreservedSpecimen	2019-09-10	Schizothorax wangchiachii (Fang, 1936)	Animalia	Chordata	Actinopterygii	Cypriniformes	Cyprinidae	Schizothoracinae	Schizothorax	species	ASIZB	30	Yang Zhao | Chenyi Niu	Zhixian Sun | Jie Bai	28.4418	99.2531	2052	WGS84	±10m	Derong	China	Sichuan	Ganzi Tibetan Autonomous Prefecture	Dingqu River	run water	{"endemicToJinshajiangR":"no", "endemicToYangtzeR":"yes", "degreeThreat":"LC"}
catalog:DQ:Fish:024	JXJ2019017	PreservedSpecimen	2019-09-10	Schizothorax wangchiachii (Fang, 1936)	Animalia	Chordata	Actinopterygii	Cypriniformes	Cyprinidae	Schizothoracinae	Schizothorax	species	ASIZB	10	Yang Zhao | Chenyi Niu	Zhixian Sun | Jie Bai	28.5607	99.2864	2170	WGS84	±10m	Derong	China	Sichuan	Ganzi Tibetan Autonomous Prefecture	Dingqu River	run water	{"endemicToJinshajiangR":"no", "endemicToYangtzeR":"yes", "degreeThreat":"LC"}
catalog:DQ:Fish:025	JXJ2019018	PreservedSpecimen	2019-09-11	Gymnocypris potanini firmispinatus Wu & Wu, 1988	Animalia	Chordata	Actinopterygii	Cypriniformes	Cyprinidae	Schizothoracinae	Gymnocypris	subspecies	ASIZB	8	Yang Zhao | Chenyi Niu	Zhixian Sun | Jie Bai	28.7953	99.2934	2440	WGS84	±10m	Derong	China	Sichuan	Ganzi Tibetan Autonomous Prefecture	Dingqu River	run water | pool	{"endemicToJinshajiangR":"yes", "endemicToYangtzeR":"yes", "degreeThreat":"NE"}
catalog:DQ:Fish:026	JXJ2019019	PreservedSpecimen	2019-09-11	Gymnocypris potanini firmispinatus Wu & Wu, 1988	Animalia	Chordata	Actinopterygii	Cypriniformes	Cyprinidae	Schizothoracinae	Gymnocypris	subspecies	ASIZB	5	Yang Zhao | Chenyi Niu	Zhixian Sun | Jie Bai	28.6269	99.3161	2285	WGS84	±10m	Derong	China	Sichuan	Ganzi Tibetan Autonomous Prefecture	Mayihe River	run water | pool	{"endemicToJinshajiangR":"yes", "endemicToYangtzeR":"yes", "degreeThreat":"NE"}
catalog:DQ:Fish:027	JXJ2019020	PreservedSpecimen	2019-09-11	Ptychobarbus chungtienensis gezaensis (Huang & Chen, 1986)	Animalia	Chordata	Actinopterygii	Cypriniformes	Cyprinidae	Schizothoracinae	Ptychobarbus	subspecies	ASIZB	1	Yang Zhao | Chenyi Niu	Zhixian Sun | Jie Bai	28.7953	99.2934	2440	WGS84	±10m	Derong	China	Sichuan	Ganzi Tibetan Autonomous Prefecture	Dingqu River	run water | pool	{"endemicToJinshajiangR":"yes", "endemicToYangtzeR":"yes", "degreeThreat":"NE"}
catalog:DQ:Fish:028	JXJ2019021	PreservedSpecimen	2019-09-11	Schizothorax wangchiachii (Fang, 1936)	Animalia	Chordata	Actinopterygii	Cypriniformes	Cyprinidae	Schizothoracinae	Schizothorax	species	ASIZB	150	Yang Zhao | Chenyi Niu	Zhixian Sun | Jie Bai	28.7953	99.2934	2440	WGS84	±10m	Derong	China	Sichuan	Ganzi Tibetan Autonomous Prefecture	Dingqu River	run water	{"endemicToJinshajiangR":"no", "endemicToYangtzeR":"yes", "degreeThreat":"LC"}
catalog:DQ:Fish:029	JXJ2019022	PreservedSpecimen	2019-09-11	Schizothorax wangchiachii (Fang, 1936)	Animalia	Chordata	Actinopterygii	Cypriniformes	Cyprinidae	Schizothoracinae	Schizothorax	species	ASIZB	71	Yang Zhao | Chenyi Niu	Zhixian Sun | Jie Bai	28.8417	99.3458	2552	WGS84	±10m	Derong	China	Sichuan	Ganzi Tibetan Autonomous Prefecture	Dingqu River	run water	{"endemicToJinshajiangR":"no", "endemicToYangtzeR":"yes", "degreeThreat":"LC"}
catalog:DQ:Fish:030	JXJ2019023	PreservedSpecimen	2019-09-11	Schizothorax wangchiachii (Fang, 1936)	Animalia	Chordata	Actinopterygii	Cypriniformes	Cyprinidae	Schizothoracinae	Schizothorax	species	ASIZB	132	Yang Zhao | Chenyi Niu	Zhixian Sun | Jie Bai	28.6269	99.3161	2285	WGS84	±10m	Derong	China	Sichuan	Ganzi Tibetan Autonomous Prefecture	Mayihe River	run water	{"endemicToJinshajiangR":"no", "endemicToYangtzeR":"yes", "degreeThreat":"LC"}
catalog:DQ:Fish:031	JXJ2019024	PreservedSpecimen	2019-09-11	Schizothorax wangchiachii (Fang, 1936)	Animalia	Chordata	Actinopterygii	Cypriniformes	Cyprinidae	Schizothoracinae	Schizothorax	species	ASIZB	1	Yang Zhao | Chenyi Niu	Zhixian Sun | Jie Bai	28.6552	99.3392	2287	WGS84	±10m	Derong	China	Sichuan	Ganzi Tibetan Autonomous Prefecture	Mayihe River	run water	{"endemicToJinshajiangR":"no", "endemicToYangtzeR":"yes", "degreeThreat":"LC"}
catalog:DQ:Fish:032	JXJ2019025	PreservedSpecimen	2019-09-11	Triplophysa bleekeri (Sauvage & Dabry de Thiersant, 1874)	Animalia	Chordata	Actinopterygii	Cypriniformes	Nemacheilidae	Nemacheilinae	Triplophysa	species	ASIZB	1	Yang Zhao | Chenyi Niu	Zhixian Sun | Jie Bai	28.8417	99.3458	2552	WGS84	±10m	Derong	China	Sichuan	Ganzi Tibetan Autonomous Prefecture	Dingqu River	rapid water	{"endemicToJinshajiangR":"no", "endemicToYangtzeR":"yes", "degreeThreat":"LC"}
catalog:DQ:Fish:033	JXJ2019026	PreservedSpecimen	2019-09-11	Triplophysa daqiaoensis Ding, 1993	Animalia	Chordata	Actinopterygii	Cypriniformes	Nemacheilidae	Nemacheilinae	Triplophysa	species	ASIZB	2	Yang Zhao | Chenyi Niu	Zhixian Sun | Jie Bai	28.7953	99.2934	2440	WGS84	±10m	Derong	China	Sichuan	Ganzi Tibetan Autonomous Prefecture	Dingqu River	rapid water	{"endemicToJinshajiangR":"yes", "endemicToYangtzeR":"yes", "degreeThreat":"DD"}
catalog:DQ:Fish:034	JXJ2019027	PreservedSpecimen	2019-09-11	Triplophysa pseudostenura He, Zhang & Song, 2013	Animalia	Chordata	Actinopterygii	Cypriniformes	Nemacheilidae	Nemacheilinae	Triplophysa	species	ASIZB	3	Yang Zhao | Chenyi Niu	Zhixian Sun | Jie Bai	28.7953	99.2934	2440	WGS84	±10m	Derong	China	Sichuan	Ganzi Tibetan Autonomous Prefecture	Dingqu River	rapid water	{"endemicToJinshajiangR":"no", "endemicToYangtzeR":"yes", "degreeThreat":"DD"}
catalog:DQ:Fish:035	JXJ2020001	PreservedSpecimen	2020-06-18	Gymnocypris potanini firmispinatus Wu & Wu, 1988	Animalia	Chordata	Actinopterygii	Cypriniformes	Cyprinidae	Schizothoracinae	Gymnocypris	subspecies	ASIZB	3	Yang Zhao | Chenyi Niu	Zhixian Sun | Jie Bai	28.8833	99.3239	2722	WGS84	±10m	Derong	China	Sichuan	Ganzi Tibetan Autonomous Prefecture	Dingqu River	run water | pool	{"endemicToJinshajiangR":"yes", "endemicToYangtzeR":"yes", "degreeThreat":"NE"}
catalog:DQ:Fish:036	JXJ2020002	PreservedSpecimen	2020-06-18	Paramisgurnus dabryanus Dabry de Thiersant, 1872	Animalia	Chordata	Actinopterygii	Cypriniformes	Cobitidae	Botiinae	Paramisgurnus	species	ASIZB	1	Yang Zhao | Chenyi Niu	Zhixian Sun | Jie Bai	28.4278	99.2745	2056	WGS84	±10m	Derong	China	Sichuan	Ganzi Tibetan Autonomous Prefecture	Shuoqu River	riffle	{"endemicToJinshajiangR":"no", "endemicToYangtzeR":"no", "degreeThreat":"LC"}
catalog:DQ:Fish:037	JXJ2020003	PreservedSpecimen	2020-06-18	Schizopygopsis malacanthus malacanthus Herzenstein, 1891	Animalia	Chordata	Actinopterygii	Cypriniformes	Cyprinidae	Schizothoracinae	Schizopygopsis	subspecies	ASIZB	2	Yang Zhao | Chenyi Niu	Zhixian Sun | Jie Bai	28.8833	99.3239	2722	WGS84	±10m	Derong	China	Sichuan	Ganzi Tibetan Autonomous Prefecture	Dingqu River	run water | pool	{"endemicToJinshajiangR":"yes", "endemicToYangtzeR":"yes", "degreeThreat":"VU"}
catalog:DQ:Fish:038	JXJ2020004	PreservedSpecimen	2020-06-18	Schizothorax chongi (Fang, 1936)	Animalia	Chordata	Actinopterygii	Cypriniformes	Cyprinidae	Schizothoracinae	Schizothorax	species	ASIZB	1	Xuejian Li | Jie Bai	Zhixian Sun | Rui Zhang	28.4278	99.2745	2056	WGS84	±10m	Derong	China	Sichuan	Ganzi Tibetan Autonomous Prefecture	Shuoqu River	run water	{"endemicToJinshajiangR":"no", "endemicToYangtzeR":"yes", "degreeThreat":"EN"}
catalog:DQ:Fish:039	JXJ2020005	PreservedSpecimen	2020-06-18	Schizothorax wangchiachii (Fang, 1936)	Animalia	Chordata	Actinopterygii	Cypriniformes	Cyprinidae	Schizothoracinae	Schizothorax	species	ASIZB	15	Xuejian Li | Jie Bai	Zhixian Sun | Rui Zhang	28.8558	99.3098	2502	WGS84	±10m	Derong	China	Sichuan	Ganzi Tibetan Autonomous Prefecture	Dingqu River	run water	{"endemicToJinshajiangR":"no", "endemicToYangtzeR":"yes", "degreeThreat":"LC"}
catalog:DQ:Fish:040	JXJ2020006	PreservedSpecimen	2020-06-18	Schizothorax wangchiachii (Fang, 1936)	Animalia	Chordata	Actinopterygii	Cypriniformes	Cyprinidae	Schizothoracinae	Schizothorax	species	ASIZB	53	Xuejian Li | Jie Bai	Zhixian Sun | Rui Zhang	28.8419	99.3463	2546	WGS84	±10m	Derong	China	Sichuan	Ganzi Tibetan Autonomous Prefecture	Dingqu River	run water	{"endemicToJinshajiangR":"no", "endemicToYangtzeR":"yes", "degreeThreat":"LC"}
catalog:DQ:Fish:041	JXJ2020007	PreservedSpecimen	2020-06-18	Schizothorax wangchiachii (Fang, 1936)	Animalia	Chordata	Actinopterygii	Cypriniformes	Cyprinidae	Schizothoracinae	Schizothorax	species	ASIZB	6	Xuejian Li | Jie Bai	Zhixian Sun | Rui Zhang	28.4423	99.2526	2062	WGS84	±10m	Derong	China	Sichuan	Ganzi Tibetan Autonomous Prefecture	Dingqu River	run water	{"endemicToJinshajiangR":"no", "endemicToYangtzeR":"yes", "degreeThreat":"LC"}
catalog:DQ:Fish:042	JXJ2020008	PreservedSpecimen	2020-06-18	Schizothorax wangchiachii (Fang, 1936)	Animalia	Chordata	Actinopterygii	Cypriniformes	Cyprinidae	Schizothoracinae	Schizothorax	species	ASIZB	38	Xuejian Li | Jie Bai	Zhixian Sun | Rui Zhang	28.4278	99.2745	2056	WGS84	±10m	Derong	China	Sichuan	Ganzi Tibetan Autonomous Prefecture	Shuoqu River	run water	{"endemicToJinshajiangR":"no", "endemicToYangtzeR":"yes", "degreeThreat":"LC"}
catalog:DQ:Fish:043	JXJ2020009	PreservedSpecimen	2020-06-18	Triplophysa bleekeri (Sauvage & Dabry de Thiersant, 1874)	Animalia	Chordata	Actinopterygii	Cypriniformes	Nemacheilidae	Nemacheilinae	Triplophysa	species	ASIZB	4	Xuejian Li | Jie Bai	Zhixian Sun | Rui Zhang	28.7953	99.2935	2457	WGS84	±10m	Derong	China	Sichuan	Ganzi Tibetan Autonomous Prefecture	Dingqu River	rapid water	{"endemicToJinshajiangR":"no", "endemicToYangtzeR":"yes", "degreeThreat":"LC"}
catalog:DQ:Fish:044	JXJ2020010	PreservedSpecimen	2020-06-20	Triplophysa brevicauda (Herzenstein, 1888)	Animalia	Chordata	Actinopterygii	Cypriniformes	Nemacheilidae	Nemacheilinae	Triplophysa	species	ASIZB	1	Xuejian Li | Jie Bai	Zhixian Sun | Rui Zhang	28.8419	99.3463	2546	WGS84	±10m	Derong	China	Sichuan	Ganzi Tibetan Autonomous Prefecture	Dingqu River	rapid water	{"endemicToJinshajiangR":"no", "endemicToYangtzeR":"yes", "degreeThreat":"DD"}
catalog:DQ:Fish:045	JXJ2020011	PreservedSpecimen	2020-06-18	Triplophysa leptosoma (Herzenstein, 1888)	Animalia	Chordata	Actinopterygii	Cypriniformes	Nemacheilidae	Nemacheilinae	Triplophysa	species	ASIZB	2	Xuejian Li | Jie Bai	Zhixian Sun | Rui Zhang	28.8558	99.3098	2502	WGS84	±10m	Derong	China	Sichuan	Ganzi Tibetan Autonomous Prefecture	Dingqu River	rapid water	{"endemicToJinshajiangR":"yes", "endemicToYangtzeR":"yes", "degreeThreat":"LC"}
catalog:DQ:Fish:046	JXJ2020012	PreservedSpecimen	2020-06-18	Triplophysa brevicauda (Herzenstein, 1888)	Animalia	Chordata	Actinopterygii	Cypriniformes	Nemacheilidae	Nemacheilinae	Triplophysa	species	ASIZB	1	Xuejian Li | Jie Bai	Zhixian Sun | Rui Zhang	28.8558	99.3098	2502	WGS84	±10m	Derong	China	Sichuan	Ganzi Tibetan Autonomous Prefecture	Dingqu River	rapid water	{"endemicToJinshajiangR":"no", "endemicToYangtzeR":"yes", "degreeThreat":"DD"}
catalog:DQ:Fish:047	JXJ2020013	PreservedSpecimen	2020-06-19	Triplophysa brevicauda (Herzenstein, 1888)	Animalia	Chordata	Actinopterygii	Cypriniformes	Nemacheilidae	Nemacheilinae	Triplophysa	species	ASIZB	1	Xuejian Li | Jie Bai	Zhixian Sun | Rui Zhang	28.8419	99.3463	2547	WGS84	±10m	Derong	China	Sichuan	Ganzi Tibetan Autonomous Prefecture	Dingqu River	rapid water	{"endemicToJinshajiangR":"no", "endemicToYangtzeR":"yes", "degreeThreat":"DD"}
catalog:DQ:Fish:049	JXJ2020015	PreservedSpecimen	2020-06-26	Gymnocypris potanini firmispinatus Wu & Wu, 1988	Animalia	Chordata	Actinopterygii	Cypriniformes	Cyprinidae	Schizothoracinae	Gymnocypris	subspecies	ASIZB	6	Xuejian Li | Jie Bai	Zhixian Sun | Rui Zhang	29.7608	99.8014	3577	WGS84	±10m	Litang	China	Sichuan	Ganzi Tibetan Autonomous Prefecture	Shuoqu River	run water | pool	{"endemicToJinshajiangR":"yes", "endemicToYangtzeR":"yes", "degreeThreat":"NE"}
catalog:DQ:Fish:050	JXJ2020016	PreservedSpecimen	2020-06-26	Gymnocypris potanini firmispinatus Wu & Wu, 1988	Animalia	Chordata	Actinopterygii	Cypriniformes	Cyprinidae	Schizothoracinae	Gymnocypris	subspecies	ASIZB	3	Xuejian Li | Jie Bai	Zhixian Sun | Rui Zhang	29.7270	99.8043	3534	WGS84	±10m	Litang	China	Sichuan	Ganzi Tibetan Autonomous Prefecture	Shuoqu River	run water | pool	{"endemicToJinshajiangR":"yes", "endemicToYangtzeR":"yes", "degreeThreat":"NE"}
catalog:DQ:Fish:051	JXJ2020017	PreservedSpecimen	2020-06-26	Ptychobarbus kaznakovi Nikolsky, 1903	Animalia	Chordata	Actinopterygii	Cypriniformes	Cyprinidae	Schizothoracinae	Ptychobarbus	species	ASIZB	1	Xuejian Li | Jie Bai	Zhixian Sun | Rui Zhang	29.7270	99.8043	3534	WGS84	±10m	Litang	China	Sichuan	Ganzi Tibetan Autonomous Prefecture	Shuoqu River	run water | pool	{"endemicToJinshajiangR":"no", "endemicToYangtzeR":"no", "degreeThreat":"VU"}
catalog:DQ:Fish:052	JXJ2020018	PreservedSpecimen	2020-06-26	Schizopygopsis malacanthus malacanthus Herzenstein, 1891	Animalia	Chordata	Actinopterygii	Cypriniformes	Cyprinidae	Schizothoracinae	Schizopygopsis	subspecies	ASIZB	6	Xuejian Li | Jie Bai	Zhixian Sun | Rui Zhang	29.7608	99.8014	3577	WGS84	±10m	Litang	China	Sichuan	Ganzi Tibetan Autonomous Prefecture	Shuoqu River	run water | pool	{"endemicToJinshajiangR":"yes", "endemicToYangtzeR":"yes", "degreeThreat":"VU"}
catalog:DQ:Fish:053	JXJ2020019	PreservedSpecimen	2020-06-26	Triplophysa pseudostenura He, Zhang & Song, 2013	Animalia	Chordata	Actinopterygii	Cypriniformes	Nemacheilidae	Nemacheilinae	Triplophysa	species	ASIZB	1	Xuejian Li | Jie Bai	Zhixian Sun | Rui Zhang	29.7608	99.8014	3577	WGS84	±10m	Litang	China	Sichuan	Ganzi Tibetan Autonomous Prefecture	Shuoqu River	rapid water	{"endemicToJinshajiangR":"no", "endemicToYangtzeR":"yes", "degreeThreat":"DD"}
catalog:DQ:Fish:054	JXJ2020020	PreservedSpecimen	2020-07-02	Gymnocypris potanini firmispinatus Wu & Wu, 1988	Animalia	Chordata	Actinopterygii	Cypriniformes	Cyprinidae	Schizothoracinae	Gymnocypris	subspecies	ASIZB	1	Xuejian Li | Jie Bai	Zhixian Sun | Rui Zhang	28.9705	99.8405	2785	WGS84	±10m	Xiangcheng	China	Sichuan	Ganzi Tibetan Autonomous Prefecture	Shuoqu River	run water | pool	{"endemicToJinshajiangR":"yes", "endemicToYangtzeR":"yes", "degreeThreat":"NE"}
catalog:DQ:Fish:055	JXJ2020021	PreservedSpecimen	2020-07-02	Schizothorax wangchiachii (Fang, 1936)	Animalia	Chordata	Actinopterygii	Cypriniformes	Cyprinidae	Schizothoracinae	Schizothorax	species	ASIZB	12	Xuejian Li | Jie Bai	Zhixian Sun | Rui Zhang	28.9705	99.8405	2785	WGS84	±10m	Xiangcheng	China	Sichuan	Ganzi Tibetan Autonomous Prefecture	Shuoqu River	run water	{"endemicToJinshajiangR":"no", "endemicToYangtzeR":"yes", "degreeThreat":"LC"}
catalog:DQ:Fish:056	JXJ2020022	PreservedSpecimen	2020-07-03	Gymnocypris potanini firmispinatus Wu & Wu, 1988	Animalia	Chordata	Actinopterygii	Cypriniformes	Cyprinidae	Schizothoracinae	Gymnocypris	subspecies	ASIZB	3	Xuejian Li | Jie Bai	Zhixian Sun | Rui Zhang	29.0254	99.8780	2857	WGS84	±10m	Xiangcheng	China	Sichuan	Ganzi Tibetan Autonomous Prefecture	Shuoqu River	run water | pool	{"endemicToJinshajiangR":"yes", "endemicToYangtzeR":"yes", "degreeThreat":"NE"}
catalog:DQ:Fish:057	JXJ2020023	PreservedSpecimen	2020-07-03	Schizopygopsis malacanthus malacanthus Herzenstein, 1891	Animalia	Chordata	Actinopterygii	Cypriniformes	Cyprinidae	Schizothoracinae	Schizopygopsis	subspecies	ASIZB	1	Xuejian Li | Jie Bai	Zhixian Sun | Rui Zhang	29.0254	99.8780	2857	WGS84	±10m	Xiangcheng	China	Sichuan	Ganzi Tibetan Autonomous Prefecture	Shuoqu River	run water | pool	{"endemicToJinshajiangR":"yes", "endemicToYangtzeR":"yes", "degreeThreat":"VU"}
catalog:DQ:Fish:058	JXJ2020024	PreservedSpecimen	2020-07-04	Ptychobarbus kaznakovi Nikolsky, 1903	Animalia	Chordata	Actinopterygii	Cypriniformes	Cyprinidae	Schizothoracinae	Ptychobarbus	species	ASIZB	1	Xuejian Li | Jie Bai	Zhixian Sun | Rui Zhang	29.0826	99.8939	2909	WGS84	±10m	Xiangcheng	China	Sichuan	Ganzi Tibetan Autonomous Prefecture	Shuoqu River	run water | pool	{"endemicToJinshajiangR":"no", "endemicToYangtzeR":"no", "degreeThreat":"VU"}
catalog:DQ:Fish:059	JXJ2020025	PreservedSpecimen	2020-07-04	Schizopygopsis malacanthus malacanthus Herzenstein, 1891	Animalia	Chordata	Actinopterygii	Cypriniformes	Cyprinidae	Schizothoracinae	Schizopygopsis	subspecies	ASIZB	1	Xuejian Li | Jie Bai	Zhixian Sun | Rui Zhang	29.0826	99.8939	2909	WGS84	±10m	Xiangcheng	China	Sichuan	Ganzi Tibetan Autonomous Prefecture	Shuoqu River	run water | pool	{"endemicToJinshajiangR":"yes", "endemicToYangtzeR":"yes", "degreeThreat":"VU"}
catalog:DQ:Fish:060	JXJ2020026	PreservedSpecimen	2020-07-04	Schizothorax wangchiachii (Fang, 1936)	Animalia	Chordata	Actinopterygii	Cypriniformes	Cyprinidae	Schizothoracinae	Schizothorax	species	ASIZB	4	Xuejian Li | Jie Bai	Zhixian Sun | Rui Zhang	29.0826	99.8939	2909	WGS84	±10m	Xiangcheng	China	Sichuan	Ganzi Tibetan Autonomous Prefecture	Shuoqu River	run water	{"endemicToJinshajiangR":"no", "endemicToYangtzeR":"yes", "degreeThreat":"LC"}
catalog:DQ:Fish:061	JXJ2020027	PreservedSpecimen	2020-07-04	Triplophysa pseudostenura He, Zhang & Song, 2013	Animalia	Chordata	Actinopterygii	Cypriniformes	Nemacheilidae	Nemacheilinae	Triplophysa	species	ASIZB	9	Xuejian Li | Jie Bai	Zhixian Sun | Rui Zhang	29.0826	99.8939	2909	WGS84	±10m	Xiangcheng	China	Sichuan	Ganzi Tibetan Autonomous Prefecture	Shuoqu River	rapid water	{"endemicToJinshajiangR":"no", "endemicToYangtzeR":"yes", "degreeThreat":"DD"}
catalog:DQ:Fish:062	JXJ2020028	PreservedSpecimen	2020-07-05	Schizopygopsis malacanthus malacanthus Herzenstein, 1891	Animalia	Chordata	Actinopterygii	Cypriniformes	Cyprinidae	Schizothoracinae	Schizopygopsis	subspecies	ASIZB	1	Xuejian Li | Jie Bai	Zhixian Sun | Rui Zhang	28.8893	99.8263	2692	WGS84	±10m	Xiangcheng	China	Sichuan	Ganzi Tibetan Autonomous Prefecture	Shuoqu River	run water | pool	{"endemicToJinshajiangR":"yes", "endemicToYangtzeR":"yes", "degreeThreat":"VU"}
catalog:DQ:Fish:063	JXJ2020029	PreservedSpecimen	2020-07-05	Triplophysa pseudostenura He, Zhang & Song, 2013	Animalia	Chordata	Actinopterygii	Cypriniformes	Nemacheilidae	Nemacheilinae	Triplophysa	species	ASIZB	7	Xuejian Li | Jie Bai	Zhixian Sun | Rui Zhang	28.8893	99.8263	2692	WGS84	±10m	Xiangcheng	China	Sichuan	Ganzi Tibetan Autonomous Prefecture	Shuoqu River	rapid water	{"endemicToJinshajiangR":"no", "endemicToYangtzeR":"yes", "degreeThreat":"DD"}
catalog:DQ:Fish:064	JXJ2020030	PreservedSpecimen	2020-07-06	Schizopygopsis malacanthus malacanthus Herzenstein, 1891	Animalia	Chordata	Actinopterygii	Cypriniformes	Cyprinidae	Schizothoracinae	Schizopygopsis	subspecies	ASIZB	2	Xuejian Li | Jie Bai	Zhixian Sun | Rui Zhang	28.8646	99.8307	2667	WGS84	±10m	Xiangcheng	China	Sichuan	Ganzi Tibetan Autonomous Prefecture	Shuoqu River	run water | pool	{"endemicToJinshajiangR":"yes", "endemicToYangtzeR":"yes", "degreeThreat":"VU"}
catalog:DQ:Fish:065	JXJ2020031	PreservedSpecimen	2020-07-06	Schizothorax wangchiachii (Fang, 1936)	Animalia	Chordata	Actinopterygii	Cypriniformes	Cyprinidae	Schizothoracinae	Schizothorax	species	ASIZB	3	Xuejian Li | Jie Bai	Zhixian Sun | Rui Zhang	28.8646	99.8307	2667	WGS84	±10m	Xiangcheng	China	Sichuan	Ganzi Tibetan Autonomous Prefecture	Shuoqu River	run water	{"endemicToJinshajiangR":"no", "endemicToYangtzeR":"yes", "degreeThreat":"LC"}
